# Supplementary material
Source: bioRxiv or medRxiv preprint supplement (http://medrxiv.org/highwire/filestream/80602/field_highwire_adjunct_files/0/2020.05.08.20095471-1.pdf)
Supplement: Supplementary file [file 2020.05.08.20095471-1.pdf]

## Supplementary Appendix (Salazar et al.)

### Table of Contents

|                                                   |    |
|---------------------------------------------------|----|
| Supplementary Methods                             | 2  |
| Table S1. ELISA Titers                            | 5  |
| Table S2. Clinical Outcomes                       | 7  |
| Table S3. Laboratory Results of Plasma Recipients | 9  |
| Figure S1. Alignment                              | 10 |

## Supplemental Methods

### *RBD and ECD Domains: Spike Protein Expression*

The stabilized prefusion S-ectodomain was previously cloned into the mammalian expression vector pαH (pNCOV-1), which contains an HRV3C cleavage site upstream of TwinStrep- and 8xHis-purification tags. The ColE1 vector was transformed and maintained in *E. coli* DH10B at 37C using ampicillin selection at 100 ug/mL. Plasmids from single colonies were recovered using a Qiagen Mini-prep kit after growing cells overnight to confluence in Superior broth (100 ug/mL ampicillin).

Expi293F cells (Thermo Fisher Scientific) were passaged twice and seeded to a density of  $7.5 \times 10^7$  cells in 25.5 mL Expi293 Expression Medium ( $2.9 \times 10^6$  cells/ml in a 125-ml flask). For each 30 mL transfection, plasmid DNA (30 ug) was added to Opti-MEM I Reduced Serum Medium to a total volume of 1.5 ml and gently mixed. ExpiFectamine 293 Reagent (81  $\mu$ L) was diluted in Opti-MEM I medium to a total volume of 1.5 mL. After gently mixing, it was incubated for 5 min at RT. After incubation, the diluted DNA was added to the diluted ExpiFectamine 293 Reagent to obtain a total volume of 3 mL and gently mixed. The mixture was incubated for 20 min at RT to allow the DNA-ExpiFectamine 293 Reagent complexes to form and then added to the Expi293F cells. After incubating cells for 20 h, 150  $\mu$ L of ExpiFectamine 293 Transfection Enhancer 1 and 1.5 mL of ExpiFectamine™ 293 Transfection Enhancer 2 were added to each flask. Cells were harvested at 7 days.

### *Protein Purification*

IMAC purification columns were used with 1 mL bed volume for each Ni-NTA column. Each prepared column was used to purify proteins from 200-250 mL of filtered tissue culture media. Following filtration, filtered tissue culture media was applied to a previously prepared and equilibrated Ni-NTA column. Each column was washed with 20 mL equilibration buffer (50 mM phosphate buffer, pH 7.5, 300 mM NaCl, 20 mM imidazole). The target protein was eluted with 5

mL elution buffer (50 mM phosphate buffer, pH 7.5, 300 mM NaCl, 250 mM imidazole). The eluate was applied to a spin concentrator with 100 kD MWCO to (1) concentrate target protein prior to FPLC purification and (2) for buffer exchange into cold 1x PBS. Spin concentrators were centrifuged at 3000 g, at 4°C for 15 min. The 100 kD MWCO assists in purification by allowing flow through of most contaminating proteins. Following buffer exchange, the eluate was concentrated to approximately 600 µL. The concentrated eluate was further purified using size-exclusion chromatography (SEC) with a 24 ml Superose 6 10/300 GL column (GE Healthcare). The 0.5 mL sample loop was injected with 1 mL each of the following: 0.1 M NaOH, RNase-free water, and 1x PBS. The buffer-exchanged eluate was applied to the FPLC sample loop and run with a flow rate 0.25 ml/min. Fractions were collected after 0.2 CV and fractionation volumes collected at 0.33 mL.

#### *ELISA protocol*

Plates were blocked with 2% milk in PBS at room temperature (RT) for 2 hrs and washed 3X with PBST (PBS with 0.1% Tween20). For serial dilutions of primary Ab (plasma or mAb), a 1:1 mix of 2% milk in PBS and PBST was used (final PBSMT: 1% milk in PBS with 0.05% Tween20) in 50 µL/well across the entire 96-well plate. Samples were then prepared in PCR plates or 8-well strips by diluting plasma 1:16.67 in PBSMT in 100 µL volumes. Negative plasma control was included on each antigen plate. For the positive control, mAb CR3022 was used. CR3022 is a neutralizing antibody that was originally cloned from a convalescent SARS patient that targets the receptor-binding domain (RBD) of SARS-CoV<sub>1</sub> and can bind to the RBD of SARS-CoV-2 with a binding affinity of 6.3 nM.<sup>2</sup> CR3022 was included on each antigen plate diluted to 9 µg/mL in PBSMT. Samples were then centrifuged at maximum speed for two minutes at RT. For each of the two antigens (spike ECD and spike RBD), 25 µL was transferred from sample well, avoiding any pelleted material at bottom, into the top well of each ELISA plate and serially diluted (final dilution in top row at 1:50 for each sample, positive control at 3 µg/mL,

volumes at 75  $\mu$ L). Binding was performed at RT for 1 hr. Plates were then washed 3X with PBST. Anti-human IgG Fab HRP (Sigma A0293) was prepared at 1:5000 dilution in PBSTM, added to plate at 50  $\mu$ L volumes, and incubated at RT for 30 min. Plates were then washed 3X with PBST. ELISA substrate (1-step Ultra TMB, Thermo Scientific cat# 34028) was warmed to RT and added to plate at 50  $\mu$ L /well. Plates were developed until top dilution reached saturation point (1 min for spike RBD; 5 min for spike ECD) and then stopped with 50  $\mu$ L of H<sub>2</sub>SO<sub>4</sub>. Plates were read at 450 nm absorbance.

#### References:

1. ter Meulen J, van den Brink EN, Poon LL, et al. Human monoclonal antibody combination against SARS coronavirus: synergy and coverage of escape mutants. PLoS Med 2006;3:e237.
2. Tian X, Li C, Huang A, et al. Potent binding of 2019 novel coronavirus spike protein by a SARS coronavirus-specific human monoclonal antibody. Emerg Microbes Infect 2020;9:382-5.

**Table S1. ELISA Titers for the ECD and RBD Domains of the SARS-CoV-2 Spike Protein Transfused to COVID-19 Patients.**

| <b>Patient</b> | <b>Donor</b> | <b>Donation<br/>Date</b> | <b>Donor Visit<br/>Number</b> | <b>RBD Titer</b> | <b>ECD Titer</b> |
|----------------|--------------|--------------------------|-------------------------------|------------------|------------------|
| 1              | 1            | 3/27/20                  | 1                             | 1350             | 150              |
| 2              | 1            | 3/27/20                  | 1                             | 1350             | 150              |
| 3              | 2            | 3/31/20                  | 1                             | 1350             | 450              |
| 4              | 1            | 3/31/20                  | 2                             | NA               | NA               |
| 5              | 2            | 3/31/20                  | 1                             | 1350             | 450              |
| 6              | 2            | 4/3/20                   | 2                             | 450              | 150              |
| 7              | 3            | 4/3/20                   | 1                             | 50               | 0                |
| 8              | 3            | 4/3/20                   | 1                             | 50               | 0                |
| 9              | 2            | 4/3/20                   | 2                             | 450              | 150              |
| 10             | 1            | 3/31/20                  | 1                             | NA               | NA               |
| 11             | 1            | 4/3/20                   | 3                             | 450              | 150              |
| 12             | 1            | 4/3/20                   | 3                             | 450              | 150              |
| 13             | 2            | 4/8/20                   | 3                             | 450              | 450              |
| 14             | 2            | 4/8/20                   | 3                             | 450              | 450              |
| 15             | 1            | 4/7/20                   | 4                             | 450              | 150              |
| 16a            | 4            | 4/9/20                   | 1                             | 0                | 0                |
| 16b*           | 5            | 4/10/20                  | 1                             | 1350             | 1350             |
| 17             | 6            | 4/9/20                   | 1                             | 450              | 450              |
| 18             | 1            | 4/7/20                   | 4                             | 450              | 150              |
| 19             | 4            | 4/9/20                   | 1                             | 0                | 0                |
| 20             | 6            | 4/9/20                   | 1                             | 450              | 450              |

|           |   |         |   |      |      |
|-----------|---|---------|---|------|------|
| <b>21</b> | 7 | 4/7/20  | 1 | 50   | 50   |
| <b>22</b> | 8 | 4/10/20 | 1 | 1350 | 1350 |
| <b>23</b> | 8 | 4/10/20 | 1 | 1350 | 1350 |
| <b>24</b> | 9 | 4/13/20 | 1 | 150  | 150  |
| <b>25</b> | 9 | 4/13/20 | 1 | 150  | 150  |

\*Patient 16 received a second transfusion on day 6.

**Table S2. Clinical Outcomes of COVID-19 Patients 7 and 14 Days after Convalescent Plasma Transfusion.**

| Patient | Score at                            |                            |                             |
|---------|-------------------------------------|----------------------------|-----------------------------|
|         | Baseline<br>(Day of<br>Transfusion) | Day 7 Post-<br>Transfusion | Day 14 Post-<br>Transfusion |
| 1       | 5                                   | 5                          | 5                           |
| 2       | 5                                   | 5                          | 5                           |
| 3       | 5                                   | 5                          | 1                           |
| 4       | 5                                   | 5                          | 2                           |
| 5       | 5                                   | 5                          | 3                           |
| 6       | 5                                   | 5                          | 3                           |
| 7       | 5                                   | 5                          | 3                           |
| 8       | 5                                   | 5                          | 6                           |
| 9       | 5                                   | 5                          | 3                           |
| 10      | 5                                   | 5                          | 3                           |
| 11      | 5                                   | 1                          | 1                           |
| 12      | 3                                   | 1                          | 1                           |
| 13      | 4                                   | 5                          | 5                           |
| 14      | 3                                   | 3                          | 1                           |
| 15      | 3                                   | 1                          | 1                           |
| 16      | 5                                   | 5                          | 3                           |
| 17      | 3                                   | 1                          | 1                           |
| 18      | 3                                   | 1                          | 1                           |
| 19      | 3                                   | 4                          | 1                           |

|           |   |   |   |
|-----------|---|---|---|
| <b>20</b> | 3 | 5 | 5 |
| <b>21</b> | 3 | 1 | 1 |
| <b>22</b> | 4 | 3 | 2 |
| <b>23</b> | 5 | 5 | 5 |
| <b>24</b> | 4 | 3 | 1 |
| <b>25</b> | 3 | 1 | 1 |



**Table S3. Laboratory Results of Plasma Recipients on Days 0, 3, 7, and 14 Post-Transfusion.**

| Patient | WBC (total)<br>normal range: 4.5-11 k/uL |       |       |        | CRP<br>normal range: 0 - 0.5 mg/dL |       |       |        | Total Bilirubin<br>normal range: 0 - 1.2 mg/dL |       |       |        | Ferritin<br>normal range: 13 - 150 ng/mL |       |       |        |
|---------|------------------------------------------|-------|-------|--------|------------------------------------|-------|-------|--------|------------------------------------------------|-------|-------|--------|------------------------------------------|-------|-------|--------|
|         | Baseline                                 | Day 3 | Day 7 | Day 14 | Baseline                           | Day 3 | Day 7 | Day 14 | Baseline                                       | Day 3 | Day 7 | Day 14 | Baseline                                 | Day 3 | Day 7 | Day 14 |
| 1       | 5.3                                      | 9.1   | 10.9  | 15.18  | 40.5                               | 37.4  | 2.9   | 12.11  | 0.4                                            | 0.6   | 0.7   | 1      | 629                                      | 2011  | 1053  | 963    |
| 2       | 15                                       | 16.5  | 27.5  | 18.34  | 33.9                               | 26.9  | 3     | 0.56   | 0.1                                            | 0.4   | 0.4   | 0.4    | 438                                      | 602   | 444   | 322    |
| 3       | 13.2                                     | 15.2  | 17.9  | NA     | 1.8                                | 0.32  | 0.2   | NA     | 3.7                                            | 1     | 0.8   | NA     | 2118                                     | 2413  | 1228  | NA     |
| 4       | 6                                        | 12.7  | 10    | 8.77   | 43.5                               | 30.82 | 3.6   | NA     | 0.4                                            | 0.4   | 0.9   | 0.8    | 816                                      | 1713  | 929   | NA     |
| 5       | 7.8                                      | 11.8  | 14.8  | 13.1   | 40.6                               | NA    | 11.81 | 0.55   | NA                                             | NA    | 1.3   | 1      | 573                                      | NA    | 661   | 345    |
| 6       | 6.15                                     | 9.14  | 11.3  | 5      | NA                                 | NA    | NA    | 1.19   | 1.1                                            | 0.7   | 0.6   | 0.4    | 4630                                     | 7140  | 3943  | 3203   |
| 7       | 4.15                                     | 7.93  | 5.56  | 4.63   | 24.6                               | 12.16 | 1.47  | 0.34   | 0.9                                            | 0.8   | 0.5   | 0.5    | 1534                                     | 2767  | 1963  | 718    |
| 8       | 10.13                                    | 7.85  | 9.67  | NA     | 5.4                                | 27.77 | 6.53  | NA     | 0.9                                            | 1.4   | 0.3   | NA     | 840                                      | 706   | 721   | NA     |
| 9       | 18.57                                    | 39.7  | 23.6  | 8.02   | 6.5                                | 6.7   | 0.77  | NA     | 1.1                                            | 5.7   | 1.1   | 0.5    | 2815                                     | 2888  | 1158  | NA     |
| 10      | 10.9                                     | 14.2  | 26    | 13.06  | 31.0                               | NA    | 13    | 0.11   | 0.5                                            | 1.6   | 1.2   | 1.4    | 808                                      | 996   | 1304  | NA     |
| 11      | 20.5                                     | 7.9   | NA    | NA     | 0.2                                | NA    | NA    | NA     | 0.3                                            | 0.4   | NA    | NA     | 24                                       | NA    | NA    | NA     |
| 12      | 40                                       | NA    | NA    | NA     | 2.2                                | NA    | NA    | NA     | 0.1                                            | NA    | NA    | NA     | NA                                       | NA    | NA    | NA     |
| 13      | 12.6                                     | 8.2   | 18.2  | 22.88  | NA                                 | 41.73 | 5.99  | 0.2    | 0.5                                            | NA    | 0.8   | 0.5    | 4660                                     | 5397  | 1969  | 1240   |
| 14      | 11.2                                     | NA    | 12    | NA     | NA                                 | NA    | NA    | NA     | 0.1                                            | NA    | 0.3   | NA     | 1149                                     | 1420  | 1978  | NA     |
| 15      | 14.1                                     | 24    | DC    | NA     | 6.5                                | 3.04  | NA    | NA     | 0.4                                            | 0.8   | NA    | NA     | 1392                                     | 1296  | NA    | NA     |
| 16      | 4.5                                      | 7.4   | 6     | 21.25  | 8.7                                | 24.69 | NA    | 0.2    | 0.2                                            | 0.5   | 0.6   | 2.1    | 362                                      | 329   | NA    | 177    |
| 17      | 27                                       | 30    | DC    | NA     | 22.5                               | 15.02 | NA    | NA     | 0.3                                            | NA    | NA    | NA     | 916                                      | 727   | NA    | NA     |
| 18      | 7.4                                      | 5     | DC    | NA     | NA                                 | NA    | NA    | NA     | 0.4                                            | 0.4   | na    | NA     | NA                                       | NA    | NA    | NA     |
| 19      | 9.6                                      | 4     | 10.5  | NA     | 14.7                               | 4.71  | 0.5   | NA     | 1.4                                            | 2.2   | 0.8   | NA     | 21707                                    | 26919 | NA    | NA     |
| 20      | 18                                       | 13    | 7     | 13.39  | 14.3                               | 14.7  | 16.56 | NA     | 0.7                                            | 0.8   | 0.5   | 1.1    | 351                                      | 482   | 259   | NA     |
| 21      | 15.2                                     | 8.4   | DC    | NA     | 30.3                               | 12.19 | NA    | NA     | 0.3                                            | 0.1   | NA    | NA     | 814                                      | NA    | NA    | NA     |
| 22      | NA                                       | 7.2   | 17.5  | 6.78   | NA                                 | 2.81  | 0.39  | NA     | NA                                             | 0.5   | 1.6   | NA     | 999                                      | 961   | 1046  | NA     |
| 23      | NA                                       | 6.4   | 9     | 10.19  | NA                                 | 6.87  | 1.02  | NA     | NA                                             | 0.3   | 0.3   | 2.6    | NA                                       | 958   | 770   | NA     |
| 24      | 10.1                                     | 11.7  | 7.8   | NA     | 4.3                                | 3.26  | 0.48  | NA     | 0.6                                            | 0.7   | 0.9   | NA     | 1064                                     | 2424  | 1972  | NA     |
| 25      | 9                                        | 19.8  | 25.2  | NA     | 31.0                               | NA    | NA    | NA     | NA                                             | NA    | NA    | NA     | 815                                      | NA    | NA    | NA     |

  

| Patient | LDH<br>normal range: 87 - 225 U/L |       |       |        | ALT<br>normal range: 5 - 50 U/L |       |       |        | AST<br>normal range: 10 - 35 U/L |       |       |        | Procalcitonin<br>normal range: <0.07 ng/ml |       |       |        |
|---------|-----------------------------------|-------|-------|--------|---------------------------------|-------|-------|--------|----------------------------------|-------|-------|--------|--------------------------------------------|-------|-------|--------|
|         | Baseline                          | Day 3 | Day 7 | Day 14 | Baseline                        | Day 3 | Day 7 | Day 14 | Baseline                         | Day 3 | Day 7 | Day 14 | Baseline                                   | Day 3 | Day 7 | Day 14 |
| 1       | 362                               | 306   | 496   | NA     | 25                              | 61    | 29    | 15     | 43                               | 49    | 37    | 25     | 0.32                                       | 0.42  | 0.1   | 1      |
| 2       | 430                               | 423   | 367   | NA     | 18                              | 24    | 35    | 74     | 35                               | 51    | 28    | 46     | 1.91                                       | 1.86  | 0.34  | 0.4    |
| 3       | NA                                | 726   | NA    | NA     | 262                             | 527   | 197   | NA     | 152                              | 157   | 40    | NA     | NA                                         | NA    | NA    | NA     |
| 4       | 466                               | 345   | 354   | NA     | 29                              | 31    | 80    | 136    | 43                               | 28    | 50    | 35     | 0.57                                       | 5.43  | 0.11  | 0.8    |
| 5       | 322                               | 336   | 326   | 286    | 10                              | NA    | 122   | 103    | 17                               | 58    | 95    | 35     | NA                                         | NA    | NA    | 1      |
| 6       | 352                               | 399   | 456   | 382    | 52                              | 67    | 45    | 40     | 129                              | 89    | 56    | 31     | 20.53                                      | 5.56  | NA    | 0.4    |
| 7       | 286                               | 453   | 338   | 324    | 48                              | 43    | 83    | 52     | 56                               | 67    | 99    | 25     | 2.7                                        | NA    | NA    | 0.5    |
| 8       | 720                               | 441   | 449   | NA     | 15                              | 12    | 15    | NA     | 42                               | 40    | 32    | NA     | 1.07                                       | 1.84  | NA    | NA     |
| 9       | 591                               | 1047  | 440   | NA     | 38                              | 120   | 100   | 34     | 64                               | 192   | 50    | 19     | 40.03                                      | 19    | NA    | 0.5    |
| 10      | 562                               | 533   | 1350  | NA     | 24                              | 83    | 279   | 54     | 36                               | 174   | 281   | 36     | 0.39                                       | NA    | NA    | 1.4    |
| 11      | 190                               | NA    | NA    | NA     | 56                              | 45    | NA    | NA     | 24                               | 29    | NA    | NA     | NA                                         | NA    | NA    | NA     |
| 12      | 324                               | NA    | NA    | NA     | 47                              | NA    | NA    | NA     | 51                               | NA    | NA    | NA     | NA                                         | NA    | NA    | NA     |
| 13      | 648                               | 406   | 394   | NA     | 81                              | NA    | 29    | 120    | 135                              | NA    | 52    | 75     | NA                                         | NA    | NA    | 0.5    |
| 14      | 431                               | 521   | NA    | NA     | 82                              | NA    | 85    | NA     | 67                               | NA    | 41    | NA     | 8.84                                       | NA    | NA    | NA     |
| 15      | 381                               | 290   | NA    | NA     | 86                              | 130   | NA    | NA     | 97                               | 64    | NA    | NA     | 0.36                                       | NA    | NA    | NA     |
| 16      | 362                               | 462   | NA    | NA     | 9                               | 12    | 15    | 19     | 30                               | 34    | 41    | 22     | 0.14                                       | 0.14  | NA    | 2.1    |
| 17      | 378                               | 305   | NA    | NA     | 17                              | NA    | NA    | NA     | 31                               | NA    | NA    | NA     | 0.07                                       | NA    | NA    | NA     |
| 18      | NA                                | NA    | NA    | NA     | 80                              | 68    | na    | NA     | 86                               | 44    | na    | NA     | NA                                         | NA    | NA    | NA     |
| 19      | 528                               | 642   | NA    | NA     | 36                              | 49    | 89    | NA     | 93                               | NA    | 62    | NA     | NA                                         | NA    | NA    | NA     |
| 20      | 356                               | 449   | 313   | 270    | 19                              | 18    | 14    | 14     | 46                               | 48    | 24    | 25     | 0.19                                       | NA    | NA    | 1.1    |
| 21      | 166                               | NA    | NA    | NA     | 48                              | 41    | NA    | NA     | 48                               | 41    | NA    | NA     | NA                                         | NA    | NA    | NA     |
| 22      | 382                               | 328   | 290   | NA     | NA                              | 24    | 30    | NA     | NA                               | 41    | 36    | NA     | NA                                         | NA    | NA    | NA     |
| 23      | NA                                | 296   | NA    | NA     | NA                              | 32    | 25    | 42     | NA                               | 24    | 25    | 33     | NA                                         | NA    | NA    | 2.6    |
| 24      | 323                               | 529   | 444   | NA     | 42                              | 39    | 76    | NA     | 51                               | 35    | 38    | NA     | NA                                         | 0.16  | NA    | NA     |
| 25      | 408                               | NA    | NA    | NA     | NA                              | NA    | NA    | NA     | NA                               | NA    | NA    | NA     | NA                                         | NA    | NA    | NA     |

NA, indicates no value was obtained for the respective time point.

Figure S1

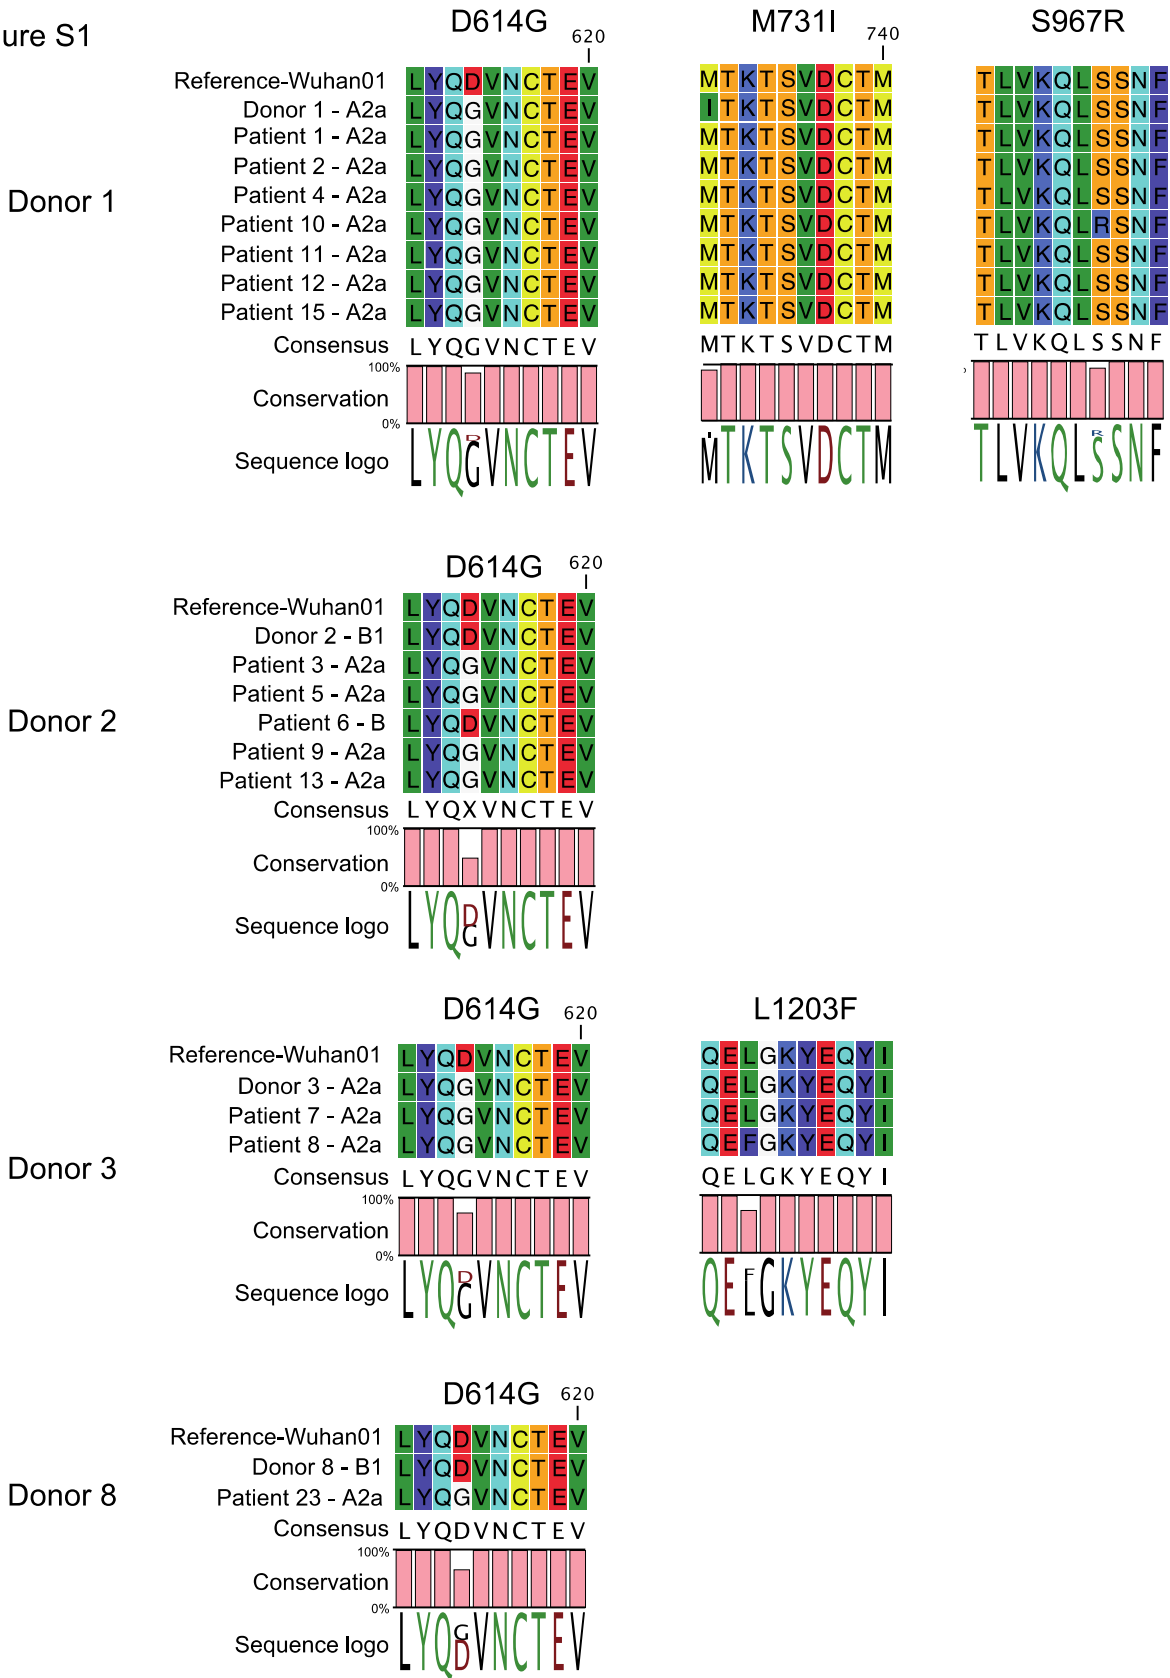

**Figure S1. Alignment of donor and recipient SARS-CoV-2 spike protein.** An analysis of the first four donors found that donor and recipient spike (S) proteins matched when their SARS-CoV-2 isolates were from the same clade. This is primarily a result of the D614G amino acid change in S protein that defines the clade A2a. However, there are at least three instances of an additional amino acid change in the S2 domain of the S protein, one in a donor (M731I) and two in recipients (S967R and L1203F).
